# Supplementary material
Source: publisher site journal article supplement (https://www.dovepress.com/article/434193)
Supplement: Supplementary file 1 [file get_supplementary_file.php]

**Supplementary Tables**

**Supplementary Table 1. Detailed eligibility criteria for clinicopathological characteristic, neoadjuvant chemotherapy response, and relapse analyses.**

|  | Inclusion criteria | Exclusion criteria |
| --- | --- | --- |
| Clinicopathological characteristic analysis | (1) female primary breast cancer;  (2) had not received any anti-tumor therapy (including surgical therapy, chemotherapy, radiotherapy, endocrine therapy, targeted therapy, biotherapy, immunotherapy, and traditional Chinese medicine therapy);  (3) had a confirmed pathological diagnosis of invasive breast cancer;  (4) the peripheral complete blood counts were measured within 1 week before treatment. | (1) had a history of cancer;  (2) suffered from any other cancers;  (3) complicated with any chronic autoimmune diseases, inflammatory diseases, infectious diseases, or hematological disorders;  (4) underwent immunosuppressive therapy chronically or before peripheral blood collection;  (5) lacked critical medical records for grading and staging. |
| Neoadjuvant chemotherapy response analysis | (1) eligible for clinicopathological characteristic analysis;  (2) underwent neoadjuvant chemotherapy;  (3) received core needle biopsy before neoadjuvant chemotherapy;  (4) assessable neoadjuvant chemotherapy response. | (1) unspecified or controversial chemotherapeutic response;  (2) unknown molecular subtype. |
| Relapse analysis | (1) eligible for clinicopathological characteristic analysis;  (2) had a regular postoperative follow-up with peripheral complete blood counts;  (3) confirmed with postoperative local recurrence and/or distant metastasis;  (4) had peripheral blood inflammation indices collected before treatment, 3-6 months after the completion of (neo)adjuvant chemotherapy and surgery, and within 3 days before and after pathologic diagnosis of recurrence and/or metastasis. | (1) abnormal neutrophil count, lymphocyte count, or platelet count in peripheral complete blood counts collected 3-6 months after chemotherapy and surgery. |

**Supplementary Table 2. The respective correlation between pretherapeutic NLR/PLR/SII and clinicopathological characteristics in patients with the four molecular subtypes of breast cancer.**

| Characteristics | All (*P* ) | HR+HER2- (*P* ) | TNBC (*P* ) | HR-HER2+ (*P* ) | HR+HER2+ (*P* ) | HR+ (*P* ) |
| --- | --- | --- | --- | --- | --- | --- |
| Age  <50 vs ≥50 |  |  |  |  |  |  |
| NLRa | **0.000** | **0.000** | **0.019** | 0.582 | **0.042** | **0.000** |
| PLR | **0.000** | **0.000** | 0.388 | **0.008** | **0.009** | **0.000** |
| SII | **0.000** | **0.000** | **0.004** | 0.450 | **0.000** | **0.000** |
| BMI  <25 vs ≥25 |  |  |  |  |  |  |
| NLR | 0.131 | 0.341 | 0.987 | 0.670 | 0.183 | 0.081 |
| PLR | 0.066 | 0.095 | 0.329 | 0.661 | 0.979 | 0.069 |
| SII | 0.164 | 0.142 | 0.422 | 0.870 | 0.979 | 0.331 |
| Menstrual status  Pre vs Post |  |  |  |  |  |  |
| NLR | **0.000** | **0.000** | 0.076 | 0.806 | **0.001** | **0.000** |
| PLR | **0.000** | **0.000** | 0.366 | 0.054 | **0.000** | **0.000** |
| SII | **0.000** | **0.000** | **0.009** | 0.516 | **0.000** | **0.000** |
| Lymph node status Negative vs Positive |  |  |  |  |  |  |
| NLR | 0.414 | **0.038** | 0.871 | 0.419 | 0.761 | 0.106 |
| PLR | 0.389 | 0.280 | 0.628 | 0.864 | 0.606 | 0.231 |
| SII | 0.584 | 0.237 | 0.987 | 0.730 | 0.504 | 0.504 |
| T stage  T0-1 vs T2-4 |  |  |  |  |  |  |
| NLR | **0.020** | **0.014** | 0.196 | 0.452 | 0.940 | **0.016** |
| PLR | 0.371 | 0.657 | 0.671 | 0.883 | 0.601 | 0.290 |
| SII | **0.040** | 0.099 | **0.033** | 0.787 | 0.852 | 0.095 |
| AJCC stage  0-I vs II-IV |  |  |  |  |  |  |
| NLR | **0.007** | **0.002** | 0.247 | 0.280 | 0.518 | **0.001** |
| PLR | 0.407 | 0.263 | 0.998 | 0.756 | 0.755 | 0.189 |
| SII | 0.059 | 0.120 | 0.077 | 0.924 | 0.755 | 0.094 |
| ER status  Negative vs Positive |  |  |  |  |  |  |
| NLR | 0.793 | 0.763 | NA | NA | 0.498 | 0.821 |
| PLR | 0.166 | 0.830 | NA | NA | 0.782 | 0.657 |
| SII | 0.144 | 0.352 | NA | NA | 0.938 | 0.254 |
| PR status  Negative vs Positive |  |  |  |  |  |  |
| NLR | 0.786 | 0.542 | NA | NA | 0.847 | 0.822 |
| PLR | 0.303 | 0.060 | NA | NA | 0.173 | 0.853 |
| SII | 0.505 | 0.209 | NA | NA | 0.870 | 0.626 |
| Ki-67  <14% vs ≥14% |  |  |  |  |  |  |
| NLR | 0.615 | 0.415 | 0.711 | 0.263 | 0.421 | 0.772 |
| PLR | **0.014** | 0.278 | 0.126 | 0.711 | 0.260 | **0.032** |
| SII | 0.242 | 0.634 | 0.137 | 0.650 | 0.244 | 0.478 |
| Histological grade  G1/2 vs G3 |  |  |  |  |  |  |
| NLR | 0.053 | 0.336 | 0.610 | 0.526 | 0.410 | 0.054 |
| PLR | 0.065 | 0.599 | 0.675 | 0.779 | 0.773 | 0.291 |
| SII | **0.002** | 0.055 | 0.214 | 0.519 | 0.537 | **0.016** |
| LVI  No vs Yes |  |  |  |  |  |  |
| NLR | 0.449 | 0.280 | 0.775 | 0.963 | 0.955 | 0.319 |
| PLR | 0.685 | 0.462 | 0.294 | 0.781 | 0.517 | 0.706 |
| SII | 0.895 | 0.814 | 0.951 | 0.364 | 0.540 | 0.667 |

BMI: body mass index; AJCC: American Joint Committee on Cancer; ER: estrogen receptor; PR: progesterone receptor; HER2: human epidermal growth factor receptor 2; TNBC: triple-negative breast cancer; HR: hormone receptor; LVI: lymphovascular invasion; NLR: neutrophil-to-lymphocyte ratio; PLR: platelet-to-lymphocyte ratio; SII: systemic immune-inflammation index; NA: not available; *P*: p-value, bold p-value indicated a statistical difference.

a: the cut-off values for grouping: NLR, 2.18 (≤2.18 vs >2.18); PLR, 124.10 (≤124.10 vs >124.10); and SII, 475.00 (≤475.00 vs >475.00).

**Supplementary Table 3. SII-based predictive scoring model** **across subtypes of breast cancer in ROC curve analysis**

|  | AUC | 95% CI | *P* |
| --- | --- | --- | --- |
| All | 0.751 | 0.675-0.827 | **0.000** |
| HR+HER2- | 0.657 | 0.540-0.774 | **0.019** |
| TNBC | 0.607 | 0.394-0.820 | 0.380 |
| HR-HER2+ | 0.635 | 0.291-0.979 | 0.436 |
| HR+HER2+ | 0.763 | 0.529-0.997 | **0.023** |
| HR+ | 0.740 | 0.653-0.826 | **0.000** |

SII: systemic immune-inflammation index; ROC: receiver operating characteristic; AUC: area under the curve; CI: confidence interval; HR: hormone receptor; HER2: human epidermal growth factor receptor 2; TNBC: triple-negative breast cancer; *P*: p-value, bold p-value indicated a statistical difference.

**Supplementary Table 4. The clinicopathological profiles of the independent cohort used for testing the SII-based predictive scoring model.**

| **Patient**  **ID** | **MP**  **grade** | **N** | **L** | **P** | **BMI** | **T**  **stage** | **PR**  **(%)** | **Ki67**  **(%)** | **HER2**  **status** | **SII** | **Prediction**  **score points** | **Predictive**  **response** | **Actual**  **response** |
| --- | --- | --- | --- | --- | --- | --- | --- | --- | --- | --- | --- | --- | --- |
| P1 | 3 | 3.09 | 1.96 | 183 | 21.67 | 2 | 90 | 30 | Negative | 288.505 | 0 | Good | Good |
| P2 | 3 | 5.31 | 0.97 | 170 | 17.97 | 2 | 50 | 20 | Negative | 930.619 | 1 | Good | Good |
| P3 | 3 | 3.93 | 2.45 | 279 | 24.84 | 2 | 10 | 50 | Negative | 447.539 | 0 | Good | Good |
| P4 | 3 | 4.95 | 1.63 | 144 | 25 | 2 | 80 | 30 | Negative | 437.301 | 1 | Good | Good |
| P5 | 3 | 3.38 | 1.58 | 179 | 23.33 | 2 | 20 | 30 | Negative | 382.924 | 0 | Good | Good |
| P6 | 3 | 2.4 | 1.62 | 198 | 20.94 | 3 | 10 | 10 | Positive | 293.333 | 1 | Good | Good |
| P7 | 3 | 0.82 | 1.09 | 77 | 23.23 | 2 | 0 | 15 | Negative | 57.927 | -1 | Good | Good |
| P8 | 3 | 4.77 | 2.2 | 277 | 27.07 | 2 | 80 | 50 | Negative | 600.586 | 2 | Good | Good |
| P9 | 3 | 2.59 | 2.35 | 240 | 23.03 | 2 | 50 | 10 | Negative | 264.511 | 1 | Good | Good |
| P10 | 3 | 4.5 | 1.9 | 245 | 30.49 | 2 | 0 | 30 | Negative | 580.263 | 0 | Good | Good |
| P11 | 3 | 5.05 | 1.86 | 332 | 23.88 | 2 | 10 | 50 | Negative | 901.398 | 1 | Good | Good |
| P12 | 4 | 2.89 | 1.68 | 243 | 19.14 | 2 | 90 | 30 | Negative | 418.018 | 0 | Good | Good |
| P13 | 3 | 3.86 | 2.05 | 199 | 23.19 | 1 | 0 | 80 | Positive | 374.702 | -1 | Good | Good |
| P14 | 3 | 3.22 | 1.25 | 189 | 23.53 | 2 | 20 | 30 | Negative | 486.864 | 0 | Good | Good |
| P15 | 3 | 2.03 | 1.82 | 164 | 19.33 | 2 | 20 | 30 | Negative | 182.923 | 0 | Good | Good |
| P16 | 3 | 4.21 | 1.36 | 318 | 26.37 | 2 | 0 | 40 | Negative | 984.397 | 1 | Good | Good |
| P17 | 3 | 3.95 | 1.13 | 260 | 24.13 | 2 | 0 | 60 | Negative | 908.850 | 0 | Good | Good |
| P18 | 4 | 2.89 | 1.70 | 241 | 18.03 | 1 | 20 | 30 | Negative | 409.700 | 0 | Good | Good |
| P19 | 4 | 4.11 | 1.60 | 312 | 21.68 | 4 | 60 | 40 | Negative | 801.450 | 3 | Poor | Good |
| P20 | 5 | 4.18 | 2.39 | 282 | 21.33 | 4 | 0 | 20 | Negative | 493.205 | 1 | Good | Good |
| P21 | 5 | 3.18 | 1.67 | 100 | 22.15 | 1 | 30 | 60 | Negative | 190.419 | 0 | Good | Good |
| P22 | 3 | 2.9 | 2.54 | 349 | 20.96 | 3 | 0 | 20 | Negative | 398.465 | -1 | Good | Good |
| P23 | 3 | 3.76 | 1.57 | 255 | 21.76 | 2 | 1 | 30 | Negative | 610.701 | 1 | Good | Good |
| P24 | 5 | 4.05 | 2.40 | 304 | 23.92 | 2 | 0 | 60 | Positive | 513.000 | -1 | Good | Good |
| P25 | 3 | 4.4 | 1.88 | 260 | 27.29 | 4 | 90 | 20 | Negative | 608.511 | 4 | Poor | Good |
| P26 | 3 | 2.53 | 1.36 | 278 | 22.19 | 2 | 70 | <5 | Negative | 517.162 | 1 | Good | Good |
| P27 | 3 | 5.04 | 1.68 | 204 | 27.59 | 2 | 20 | 20 | Negative | 612.000 | 2 | Good | Good |
| P28 | 4 | 5.51 | 1.97 | 293 | 31.24 | 3 | 10 | 40 | Negative | 819.508 | 2 | Good | Good |
| P29 | 3 | 2.95 | 1.54 | 148 | 23.34 | 2 | 20 | 30 | Negative | 283.506 | 0 | Good | Good |
| P30 | 3 | 2.76 | 1.56 | 199 | 21.5 | 2 | 40 | 20 | Negative | 352.077 | 0 | Good | Good |
| P31 | 3 | 4.09 | 0.75 | 190 | 23.34 | 2 | 0 | 15 | Positive | 1036.133 | 0 | Good | Good |
| P32 | 4 | 3.23 | 2.88 | 337 | 21.83 | 4 | 0 | 10 | Positive | 377.955 | 2 | Good | Good |
| P33 | 2 | 2.38 | 1.4 | 183 | 22.18 | 2 | 90 | 30 | Negative | 311.100 | 0 | Good | Poor |
| P34 | 2 | 6.88 | 1.29 | 340 | 27.05 | 2 | 30 | 25 | Negative | 1813.333 | 2 | Good | Poor |
| P35 | 2 | 3.51 | 0.92 | 88 | 19.43 | 4 | 90 | 10 | Negative | 335.739 | 3 | Poor | Poor |
| P36 | 3 | 2.28 | 1.39 | 289 | 25.1 | 2 | >90 | 70 | Negative | 474.043 | 1 | Good | Good |
| P37 | 5 | 2.09 | 2.32 | 207 | 23.44 | 1 | 0 | 80 | Negative | 186.478 | -1 | Good | Good |
| P38 | 2 | 5.66 | 1.4 | 270 | 27.29 | 2 | 0 | 20 | Negative | 1091.571 | 1 | Good | Poor |
| P39 | 3 | 1.79 | 1.25 | 241 | 20.55 | 2 | >90 | 5 | Negative | 345.112 | 1 | Good | Good |
| P40 | 3 | 4.33 | 1.89 | 339 | 21.36 | 2 | 30 | 10-20 | Positive | 776.651 | 1 | Good | Good |
| P41 | 3 | 7.64 | 1.05 | 296 | 22.6 | 2 | 0 | 60 | Positive | 2153.752 | 0 | Good | Good |
| P42 | 3 | 3.83 | 1.36 | 145 | 22.03 | 2 | 20 | 70 | Positive | 408.346 | 0 | Good | Good |
| P43 | 3 | 5.07 | 1.56 | 202 | 19.72 | 2 | 70 | 30 | Negative | 656.500 | 1 | Good | Good |
| P44 | 5 | 4.45 | 2.46 | 369 | 19.96 | 2 | 0 | 40 | Negative | 667.500 | 0 | Good | Good |
| P45 | 4 | 4.12 | 1.33 | 221 | 19.53 | 2 | 90 | 20 | Negative | 684.602 | 1 | Good | Good |
| P46 | 3 | 3.66 | 1.69 | 335 | 23.03 | 2 | 80 | 20 | Negative | 725.503 | 1 | Good | Good |
| P47 | 2 | 2.46 | 1 | 191 | 29.22 | 4 | 80 | 30 | Negative | 469.860 | 3 | Poor | Poor |
| P48 | 3 | 4.54 | 1.5 | 247 | 23.44 | 3 | 20 | 30 | Negative | 747.587 | 2 | Good | Good |
| P49 | 3 | 5.86 | 0.96 | 145 | 17.48 | 2 | 0 | 40 | Positive | 885.104 | 1 | Good | Good |
| P50 | 2 | 5.28 | 2.04 | 285 | 21.63 | 4 | 5 | 20 | Negative | 737.647 | 3 | Poor | Poor |
| P51 | 2 | 7.03 | 1.72 | 271 | 34.89 | 2 | 90 | 10 | Negative | 1107.634 | 3 | Poor | Poor |
| P52 | 2 | 2.15 | 2.13 | 351 | 23.05 | 2 | 5 | 70 | Negative | 354.296 | 0 | Good | Poor |
| P53 | 2 | 5.54 | 1.14 | 195 | 25.64 | 4 | 70 | 20 | Negative | 947.632 | 4 | Poor | Poor |
| P54 | 2 | 3.23 | 0.77 | 208 | 24 | 4 | 10 | 40 | Negative | 872.519 | 3 | Poor | Poor |

ID: identification; MP: Miller-Payne; BMI: body mass index; PR: progesterone receptor; HER2: human epidermal growth factor receptor 2; SII: systemic immune-inflammation index; N: Neutrophil; P: Platelet; L: Lymphocyte.

**Article title:** **Predictive significance of systemic immune-inflammation index in patients with breast cancer: a retrospective cohort study**

**Journal name:** **OncoTargets and Therapy**

**Author names:** **Yunxiang Zhou, Xianan Guo, Lu Shen, Kexin Liu, Qunan Sun, Yali Wang, Hui Wang, Wenyu Fu, Yihan Yao, Shijie Wu, Huihui Chen, Jili Qiu, Tao Pan, Yongchuan Deng**

**Correspondence: Yongchuan Deng, dyc001@zju.edu.cn; Tao Pan, 2311318@zju.edu.cn.**

**Department of Breast Surgery, The Second Affiliated Hospital of Zhejiang University School of Medicine.**
